# Supplementary material
Source: HighWire-hosted journal article supplement (https://bmjopen.bmj.com/content/8/2/e019051)
Supplement: inline-supplementary-material-1 [file inline-supplementary-material-1.pdf]

**Supplementary Table 1.** Diagnostic performance of individual TMs

| TM     | Sensitivity<br>(%) | Specificity<br>(%) | Youden<br>index |
|--------|--------------------|--------------------|-----------------|
| AFP    | 0.68               | 99.42              | 0.01            |
| PSA    | 6.35               | 80.37              | 0.05            |
| FPSA   | 13.89              | 87.59              | 0.12            |
| SCC    | 29.27              | 59.05              | 0.17            |
| CA724  | 22.36              | 95.13              | 0.21            |
| TSGF   | 33.33              | 71.43              | 0.24            |
| CA242  | 28.47              | 93.19              | 0.27            |
| NSE    | 30.70              | 91.80              | 0.28            |
| CA199  | 31.90              | 89.96              | 0.29            |
| CA153  | 33.87              | 84.90              | 0.29            |
| CA125  | 34.08              | 92.18              | 0.31            |
| CA50   | 48.94              | 77.14              | 0.38            |
| CYFRA2 | 51.43              | 78.81              | 0.41            |
| 11     |                    |                    |                 |
| CEA    | 52.70              | 91.19              | 0.48            |



**Supplementary Table 2.** Factors influencing each expense.

| Dependent variable      | R     | R <sup>2</sup> | Independent variable | P     |
|-------------------------|-------|----------------|----------------------|-------|
| TM expense              | 0.990 | 0.980          | Number of TMs        | <0.05 |
|                         |       |                | Age                  | <0.05 |
|                         |       |                | Year of discharge    | <0.05 |
|                         |       |                | Number of diagnoses  | <0.05 |
|                         |       |                | Hospital stay        | <0.05 |
| Examination expense     | 0.603 | 0.364          | Number of TMs        | <0.05 |
|                         |       |                | Age                  | <0.05 |
|                         |       |                | Number of diagnoses  | <0.05 |
|                         |       |                | Hospital stay        | <0.05 |
|                         |       |                | Year of discharge    | 0.141 |
| Hospitalization expense | 0.859 | 0.737          | Age                  | <0.05 |
|                         |       |                | Number of            | <0.05 |

---

diagnoses

Hospital stay <0.05

Year of discharge <0.05

Examination <0.05

expense

Number of TMs 0.124

TM expense 0.23

---
